# Supplementary material
Source: Frontiers journal article supplement (https://www.frontiersin.org/articles/365552)

Fig. S1. Randomized block design (RBD) of field trial.

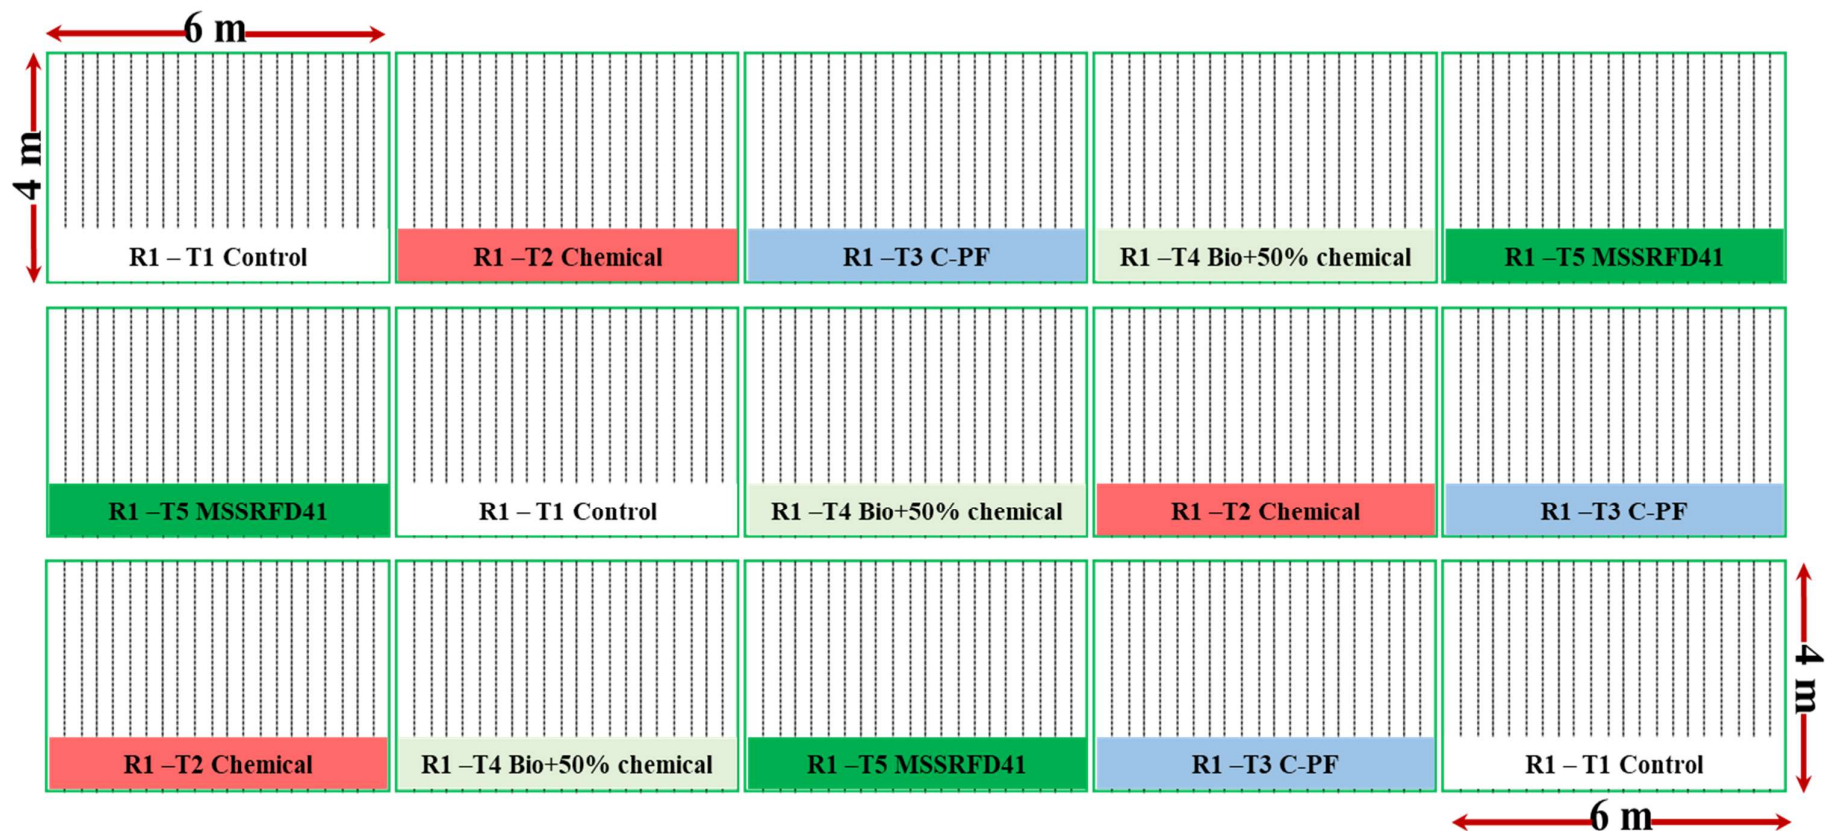

Supplement: Image_1.PDF [file Image_1.PDF]
